# Supplementary material for: Electrochemical behavior of a Rh(pentamethylcyclopentadienyl) complex bearing an NAD+/NADH-functionalized ligand
Source: Royal Society of Chemistry journal article supplement (doi:10.1039/c7dt04594h), 2018-01-01
Supplement: c7dt04594h1.pdf [file c7dt04594h1.pdf]

## Supplementary Information for

### **Electrochemical behavior of a Rh(pentamethylcyclopentadienyl) complex bearing an NAD<sup>+</sup>/NADH-functionalized ligand**

Katsuaki Kobayashi,<sup>a\*</sup> Take-aki Koizumi,<sup>b</sup> Debashis Ghosh,<sup>c</sup> Takashi Kajiwara,<sup>c</sup> Susumu Kitagawa,<sup>c</sup> Koji Tanaka<sup>c\*</sup>

<sup>a</sup>*Department of Chemistry, Graduate School of Science, Osaka City University, Sumiyoshi-ku, Osaka 558-8585 Japan*

<sup>b</sup>*Laboratory for Chemistry and Life Science, Institute of Innovative Research, Tokyo Institute of Technology, 4259 Nagatsuta, Midori-ku, Yokohama 226-8503, Japan*

<sup>c</sup>*Institute for Integrated Cell–Material Sciences (KUIAS/iCeMS), Kyoto University, Yoshida, Sakyo-ku, Kyoto 606-8501, Japan*

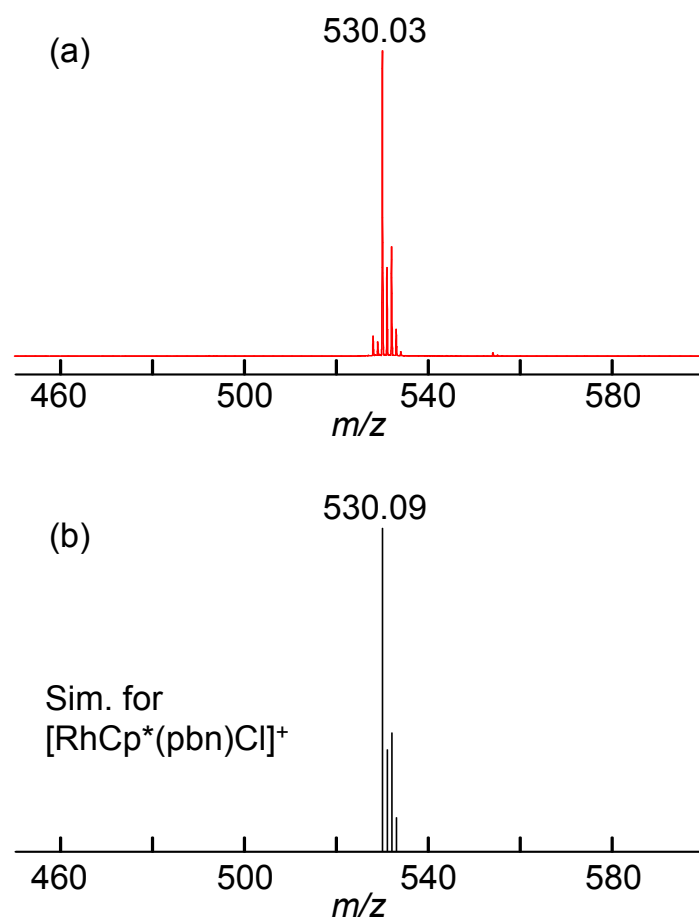

**Figure S1.** (a) ESI-MS spectrum of  $[1]Cl$  in  $CH_3CN$  containing 10% TEA and (b) simulated spectrum of  $[1]^+$ .

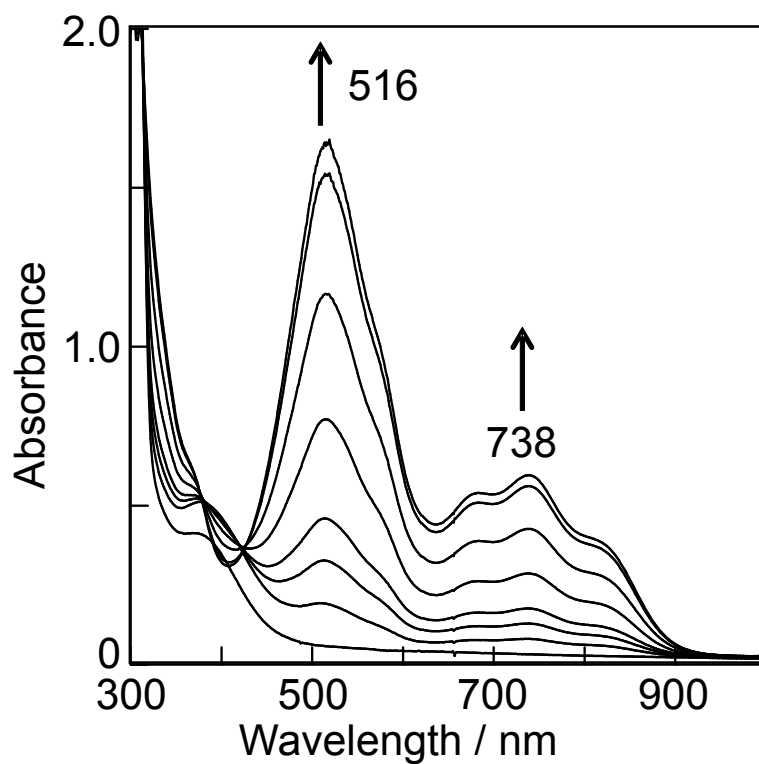

**Figure S2.** Spectral changes for [RhCp\*(bpy)Cl]Cl during reduction at  $-1.0$  V (vs. SCE) in  $\text{CH}_3\text{CN}$  with  $0.1$  M  $[\text{nBu}_4][\text{PF}_6]$  as the supporting electrolyte.

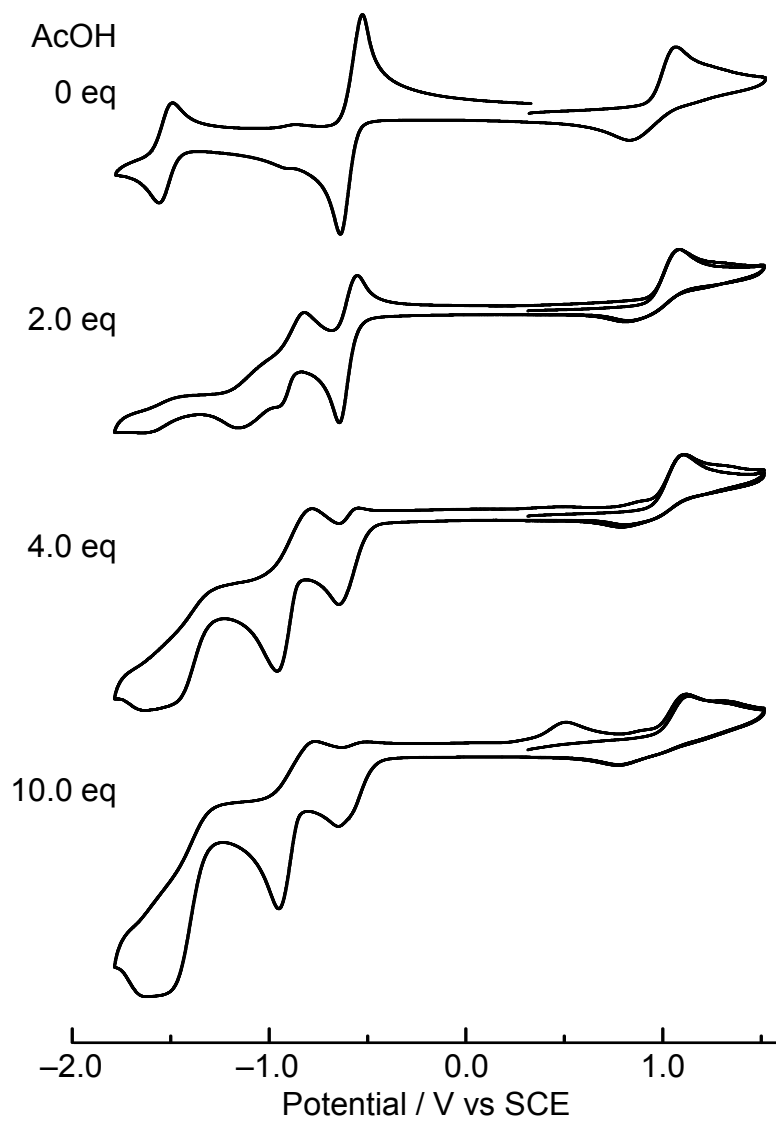

**Figure S3.** Cyclic voltammograms of [1]Cl in the presence of varying amounts of AcOH.

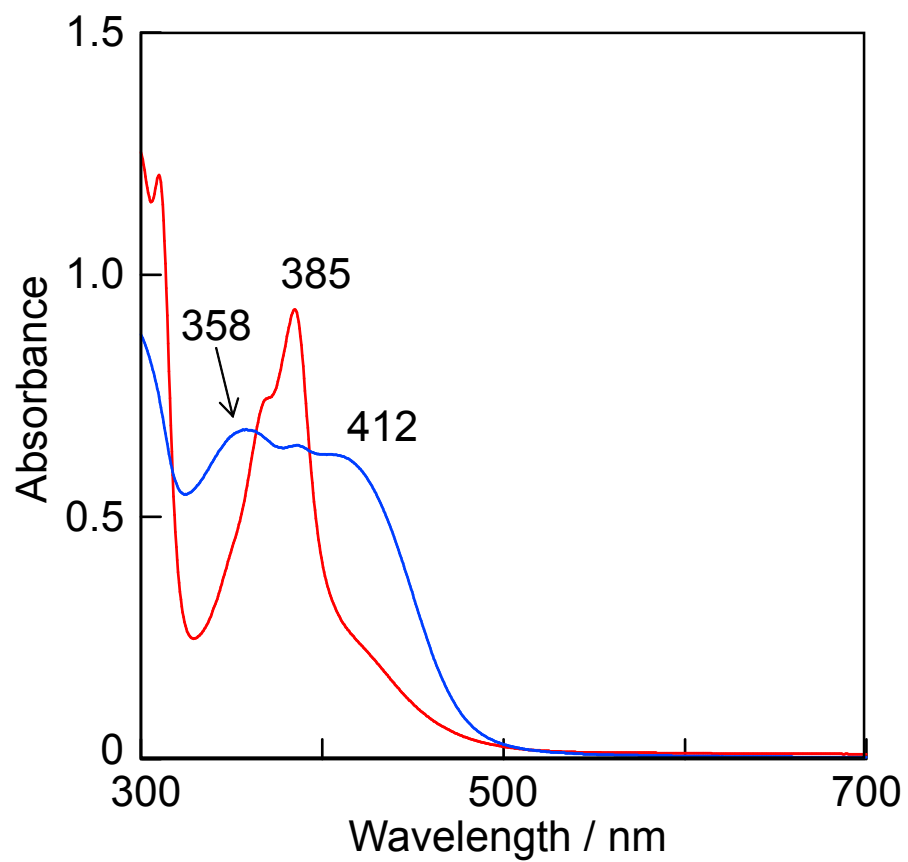

**Figure S4.** Electronic spectra of [1]Cl in the absence of CoCp<sub>2</sub> (red line) and the presence of 2 equiv. of CoCp<sub>2</sub> (blue line) in CH<sub>3</sub>CN containing 1.0% AcOH.

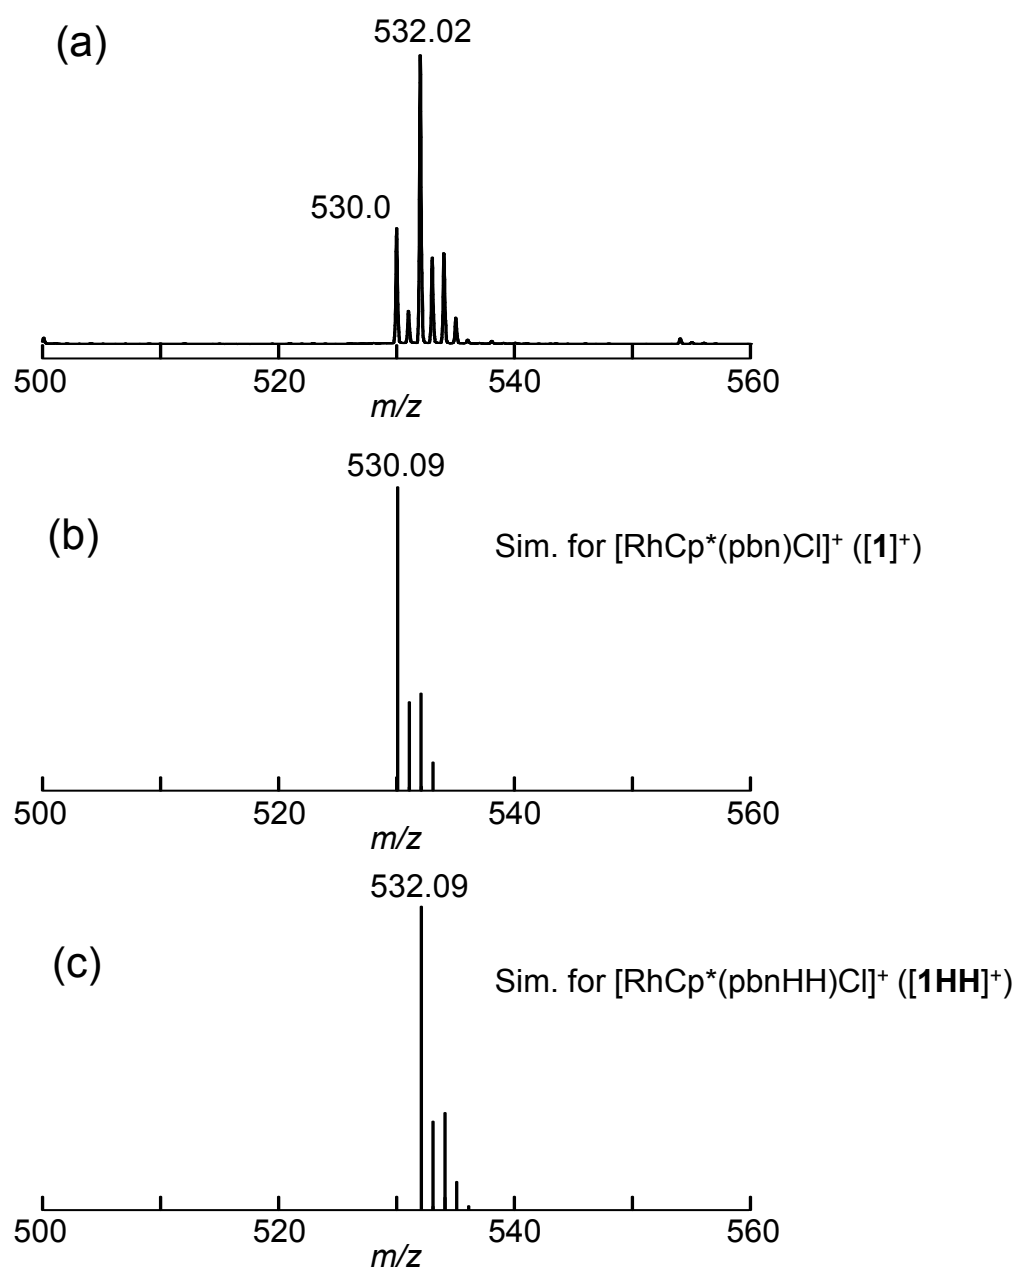

**Figure S5.** (a) ESI-MS spectrum of  $[1]Cl$  in the presence of 1.0% AcOH containing 2 equiv. of  $CoCp_2$  in  $CH_3CN$ , as well as simulated spectra of (b)  $[1]^+$  and (c)  $[1HH]^+$ .

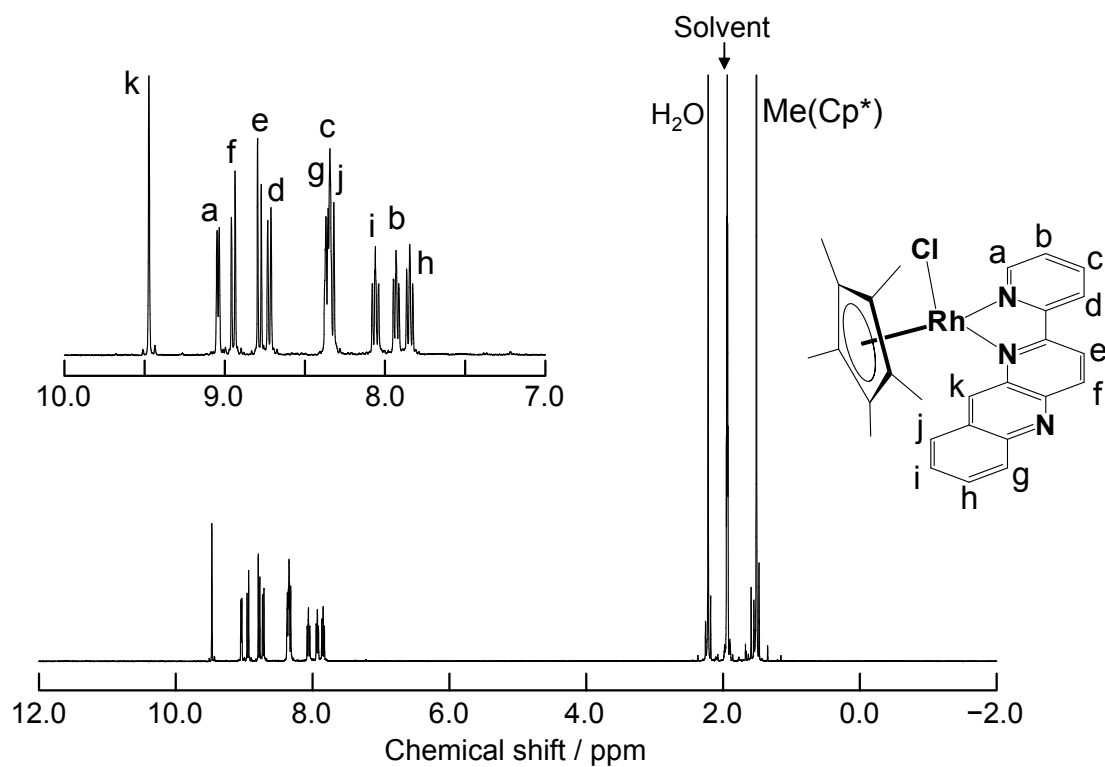

**Figure S6.**  $^1\text{H}$  NMR spectrum (400 MHz) of  $[\mathbf{1}]\text{Cl}$  in  $\text{CD}_3\text{CN}$ .

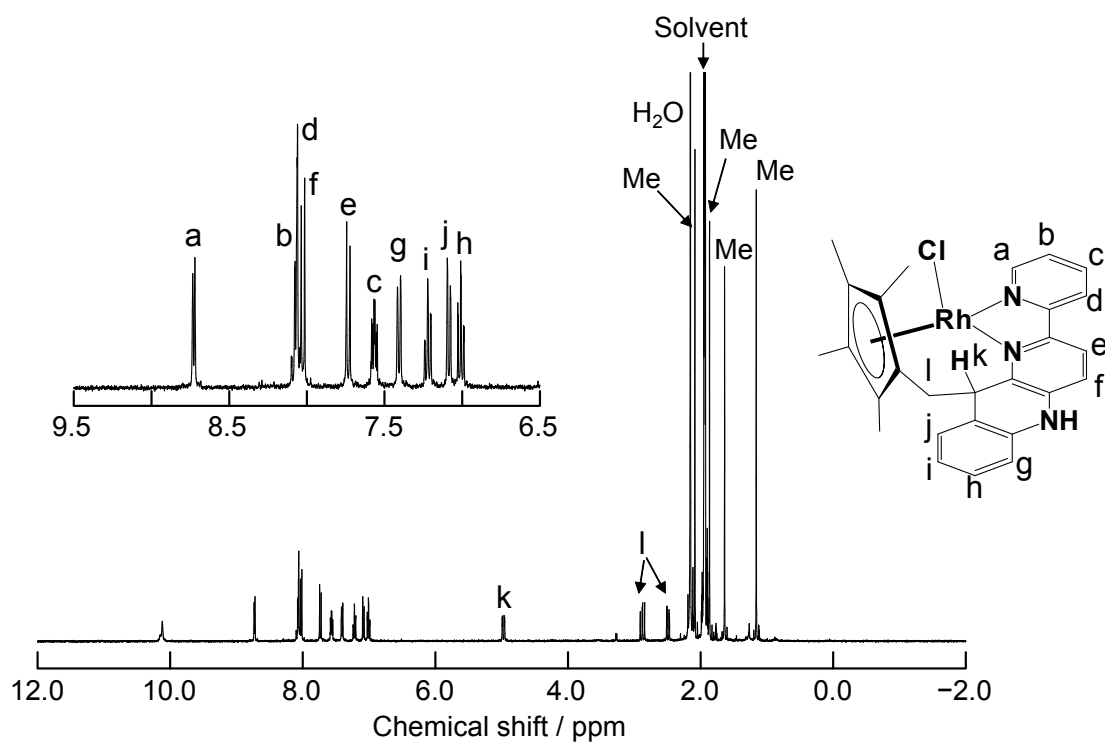

**Figure S7.**  $^1\text{H}$  NMR spectrum (400 MHz) of  $[\mathbf{1CH}]\text{Cl}$  in  $\text{CD}_3\text{CN}$ .

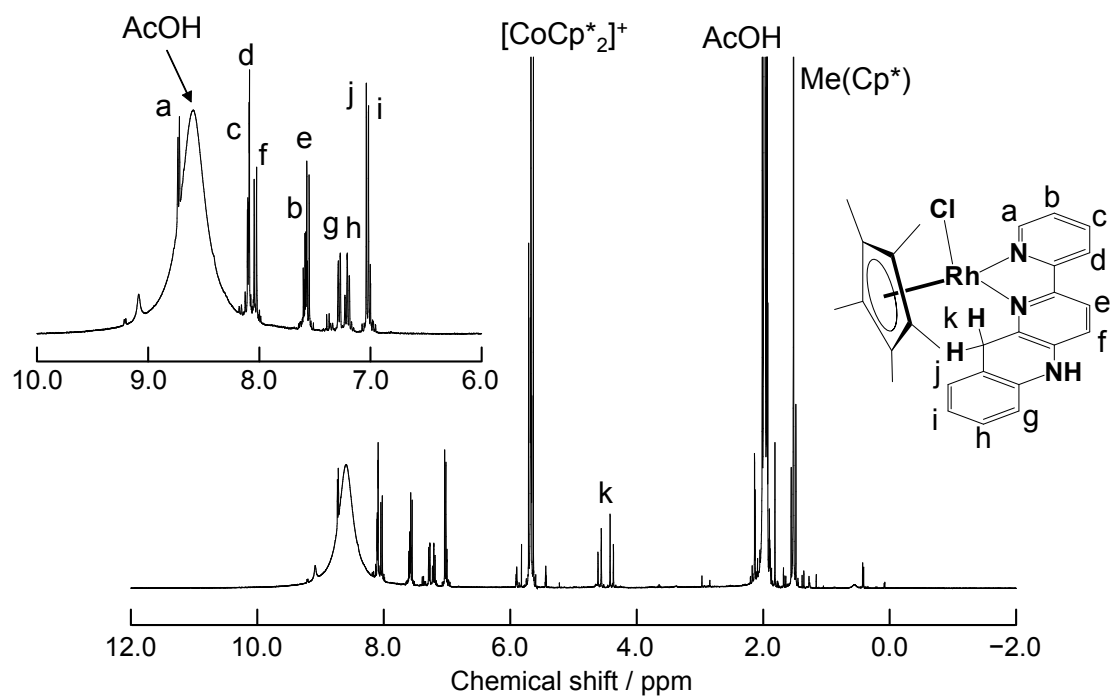

**Figure S8.**  $^1\text{H}$  NMR spectrum (400 MHz) of [1]Cl containing 2 equiv. of  $\text{CoCp}_2$  in 1.0% AcOH/ $\text{CD}_3\text{CN}$ .
